# Supplementary material for: Adult ADHD, Emotion Dysregulation, and Functional Outcomes: Examining the Role of Emotion Regulation Strategies
Source: Springer Nature journal article supplement (doi:10.1007/s10862-018-9695-1), 2018-08-31
Supplement: MOESM1 [file 16090594]

**Supplementary Materials**

**Table of Contents**

This supplementary document includes results from all mediation analyses run for this study. Figures 1-10 show simple mediation analyses with deficits in emotion regulation mediating the relationship between ADHD (symptoms or diagnosis) and all outcomes of interest. Figures 11-18 test various emotion regulation strategies as mediators on the relationship between ADHD and deficits in emotion regulation. Figures 19-38 test avoidance as a mediator on the relationship between ADHD and all outcomes. Finally, avoidance is tested in serial mediation models 39-58.

ADHD -> Deficits in Emotion Regulation (DERS)-> Outcomes

1. Sx-> DERS ->CESD
2. Sx-> DERS ->GAD
3. Sx-> DERS ->Sat
4. Sx-> DERS ->RAS
5. Sx-> DERS ->BFIS
6. Dx-> DERS ->CESD
7. Dx-> DERS ->GAD
8. Dx-> DERS ->Sat
9. Dx-> DERS ->RAS
10. Dx-> DERS ->BFIS

ADHD -> Emotion Regulation Strategies -> DERS

1. Sx->CBAS->DERS
2. Sx->AAQ->DERS
3. Sx->ERQ-s->DERS
4. Sx->ERQ-r->DERS
5. Dx->CBAS->DERS
6. Dx->AAQ->DERS
7. Dx->ERQ-s->DERS
8. Dx->ERQ-r->DERS

ADHD-> Avoidance -> Outcomes

1. Sx->CBAS->CESD
2. Sx->CBAS->GAD
3. Sx->CBAS->Sat
4. Sx->CBAS->RAS
5. Sx->CBAS->BFIS
6. Sx->AAQ->CESD
7. Sx->AAQ->GAD
8. Sx->AAQ->Sat
9. Sx->AAQ->RAS
10. Sx->AAQ->BFIS
11. Dx->CBAS->CESD
12. Dx->CBAS->GAD
13. Dx->CBAS->Sat
14. Dx->CBAS->RAS
15. Dx->CBAS->BFIS
16. Dx->AAQ->CESD
17. Dx->AAQ->GAD
18. Dx->AAQ->Sat
19. Dx->AAQ->RAS
20. Dx->AAQ->BFIS

ADHD->Avoidance -> DERS -> Outcomes

1. Sx->CBAS->DERS->CESD
2. Sx->CBAS->DERS->GAD
3. Sx->CBAS->DERS->Sat
4. Sx->CBAS->DERS->RAS
5. Sx->CBAS->DERS->BFIS
6. Sx->AAQ->DERS->CESD
7. Sx->AAQ->DERS->GAD
8. Sx->AAQ->DERS->Sat
9. Sx->AAQ->DERS->RAS
10. Sx->AAQ->DERS->BFIS
11. Dx->CBAS->DERS->CESD
12. Dx->CBAS->DERS->GAD
13. Dx->CBAS->DERS->Sat
14. Dx->CBAS->DERS->RAS
15. Dx->CBAS->DERS->BFIS
16. Dx->AAQ->DERS->CESD
17. Dx->AAQ->DERS->GAD
18. Dx->AAQ->DERS->Sat
19. Dx->AAQ->DERS->RAS
20. Dx->AAQ->DERS->BFIS

Deficits in Emotion Regulation

.55 **

.71 **

Depression

Symptoms

(CES-D)

ADHD Symptoms

(BAARS)

.10

Figure 1: A simple mediation model with deficits in emotion regulation mediating the relationship between ADHD symptoms and depression symptoms. Indirect effect: .38, 95% CI: .27:.50.

Deficits in Emotion Regulation

.54 **

.71 **

Anxiety Symptoms

(GAD-7)

ADHD Symptoms

(BAARS)

.24*

Figure 2: A simple mediation model with deficits in emotion regulation mediating the relationship between ADHD symptoms and anxiety symptoms. Indirect effect: .38, 95% CI: .25:.53.

Deficits in Emotion Regulation

-.35 **

.71**

Friendship Satisfaction

(Sat)

ADHD Symptoms

(BAARS)

.04

Figure 3: A simple mediation model with deficits in emotion regulation mediating the relationship between ADHD symptoms and friendship satisfaction. Indirect effect: -.24, 95% CI: -.39:-11.

Deficits in Emotion Regulation

-.35**

.81 **

Relationship Satisfaction

(RAS)

ADHD Symptoms

(BAARS)

-.02

Figure 4: A simple mediation model with deficits in emotion regulation mediating the relationship between ADHD symptoms and relationship satisfaction. Indirect effect: -.28, 95% CI: -.54:-.06.

Deficits in Emotion Regulation

.92**

.71 **

Functional Impairment

(BFIS)

ADHD Symptoms

(BAARS)

1.9 **

Figure 5: A simple mediation model with deficits in emotion regulation mediating the relationship between ADHD symptoms and overall functional impairment. Indirect effect: .65, 95% CI: .39:.97.

Deficits in Emotion Regulation

.58**

-.67 **

Depression

Symptoms

(CES-D)

ADHD

Diagnosis

-.07

Figure 6: A simple mediation model with deficits in emotion regulation mediating the relationship between self-reported ADHD diagnosis and depression symptoms. Indirect effect: -.39, 95%

CI: -.54:-.25.

Deficits in Emotion Regulation

-.67**

.64**

ADHD

Diagnosis

Anxiety

Symptoms

(GAD-7)

-.12

Figure 7: A simple mediation model with deficits in emotion regulation mediating the relationship between self-reported ADHD diagnosis and anxiety symptoms. Indirect effect: -.43, 95% CI: -62: -.26.

Deficits in Emotion Regulation

-.67**

-.34**

Friendship Satisfaction

(Sat)

ADHD

Diagnosis

-.09

Figure 8: A simple mediation model with deficits in emotion regulation mediating the relationship between self-reported ADHD diagnosis and friendship satisfaction. Indirect effect: .23, 95% CI: .10:.39.

Deficits in Emotion Regulation

-.40**

-.76**

Relationship Satisfaction

(RAS)

ADHD

Diagnosis

Relationship Satisfaction

(RAS)

-.13

Figure 9: A simple mediation model with deficits in emotion regulation mediating the relationship between self-reported ADHD diagnosis and relationship satisfaction. Indirect effect: .30, 95% CI: .11:.54.

Deficits in Emotion Regulation

-.67**

-1.50**

ADHD

Diagnosis

Functional Impairment

(BFIS)

-1.91**

Figure 10: A simple mediation model with deficits in emotion regulation mediating the relationship between self-reported ADHD diagnosis and overall functional impairment. Indirect effect: -1.01, 95% CI: -1.45:-61.

Avoidance

(CBAS)

.84 **

.49**

Deficits in Emotion Regulation

ADHD

Symptoms

.29 **

Figure 11: A simple mediation model with cognitive behavioral avoidance mediating the relationship between self-reported ADHD symptoms and deficits in emotion regulation. Indirect effect: .41, 95% CI: .26:.59.

Avoidance

(AAQ)

.28 **

1.23 **

Deficits in Emotion Regulation

ADHD

Symptoms

.36 **

Figure 12: A simple mediation model with experiential avoidance mediating the relationship between self-reported ADHD symptoms and deficits in emotion regulation. Indirect effect: .35, 95% CI: .22:

.50.

Reappraisal

(ERQ-r)

-.18**

-.23

Deficits in Emotion Regulation

ADHD

Symptoms

.66 **

Figure 13: A simple mediation model with reappraisal mediating the relationship between self-reported ADHD symptoms and deficits in emotion regulation. Indirect effect: .04, 95% CI: -.004: .10.

Suppression

(ERQ-s)

.08*

.12

Deficits in Emotion Regulation

ADHD

Symptoms

.70**

Figure 14: A simple mediation model with suppression mediating the relationship between self-reported ADHD symptoms and deficits in emotion regulation. Indirect effect: .009, 95% CI: -.02:.05.

Avoidance

(CBAS)

.59**

-.83**

Deficits in Emotion Regulation

ADHD

Diagnosis

-.18

Figure 15: A simple mediation model with cognitive behavioral avoidance mediating the relationship between self-reported ADHD diagnosis and deficits in emotion regulation. Indirect effect: -.49, 95% CI: -.71:-.30.

Avoidance

(AAQ)

.34**

-1.08 **

Deficits in Emotion Regulation

ADHD

Diagnosis

-.31 **

Figure 16: A simple mediation model with experiential avoidance mediating the relationship between self-reported ADHD diagnosis and deficits in emotion regulation. Indirect effect: -.36, 95% CI: -.56:-.19.

Reappraisal

(ERQ-r)

-.21 **

.22

Deficits in Emotion Regulation

ADHD

Diagnosis

-.63**

Figure 17: A simple mediation model with reappraisal mediating the relationship between self-reported ADHD diagnosis and deficits in emotion regulation. Indirect effect: -.05, 95% CI: -.14:.03.

Suppression

(ERQ-s)

-.08

-.10*

Deficits in Emotion Regulation

ADHD

Diagnosis

-.66 **

Figure 18: A simple mediation model with suppression mediating the relationship between self-reported ADHD diagnosis and deficits in emotion regulation. Indirect effect: -.01, 95% CI: -.07:.03.

Avoidance

(CBAS)

.84**

.47**

Depression

Symptoms

(CES-D)

ADHD Symptoms

(BAARS)

.09

Figure 19: A simple mediation model with cognitive behavioral avoidance mediating the relationship between ADHD symptoms and depression symptoms. Indirect effect: .40, 95% CI: .30:.51.

Avoidance

(CBAS)

.84**

.45**

Anxiety

Symptoms

(GAD-7)

ADHD Symptoms

(BAARS)

.24**

Figure 20: A simple mediation model with cognitive behavioral avoidance mediating the relationship between ADHD symptoms and anxiety symptoms. Indirect effect: .37, 95% CI: .26:.50.

Avoidance

(CBAS)

-.36 **

.84**

Friendship Satisfaction

(Sat)

ADHD Symptoms

(BAARS)

.10

Figure 21: A simple mediation model with cognitive behavioral avoidance mediating the relationship between ADHD symptoms and friendship satisfaction. Indirect effect: -.31, 95% CI: -.44:-.18.

Avoidance

(CBAS)

-.43**

.84**

Relationship Satisfaction

(RAS)

ADHD Symptoms

(BAARS)

.06

Figure 22: A simple mediation model with cognitive behavioral avoidance mediating the relationship between ADHD symptoms and relationship satisfaction. Indirect effect: -.36, 95% CI: -.59:-18.

Avoidance

(CBAS)

.84**

.99**

Functional Impairment

(BFIS)

ADHD Symptoms

(BAARS)

1.72**

Figure 23: A simple mediation model with cognitive behavioral avoidance mediating the relationship between ADHD symptoms and overall functional impairment. Indirect effect: .83, 95% CI: .53:1.19.

Avoidance

(AAQ)

.28**

1.23**

Depression

Symptoms

(CES-D)

ADHD Symptoms

(BAARS)

.15*

Figure 24: A simple mediation model with experiential avoidance mediating the relationship between ADHD symptoms and depression symptoms. Indirect effect: .34, 95% CI: .24:.45.

Avoidance

(AAQ)

.30**

1.23**

Anxiety

Symptoms

(GAD-7)

ADHD Symptoms

(BAARS)

.25**

Figure 25: A simple mediation model with experiential avoidance mediating the relationship between ADHD symptoms and anxiety symptoms. Indirect effect: .37, 95% CI: .26:.50.

Avoidance

(AAQ)

-.16**

1.23**

Friendship Satisfaction

(Sat)

ADHD Symptoms

(BAARS)

-.002

Figure 26: A simple mediation model with experiential avoidance mediating the relationship between ADHD symptoms and friendship satisfaction. Indirect effect: -.20, 95% CI: -.32:-.09.

Avoidance

(AAQ)

-.22**

1.30**

Relationship Satisfaction

(RAS)

ADHD Symptoms

(BAARS)

-.02

Figure 27: A simple mediation model with experiential avoidance mediating the relationship between ADHD symptoms and relationship satisfaction. Indirect effect: -.28, 95% CI: -.48:-.13.

Avoidance

(AAQ)

.48**

1.23**

Functional Impairment

(BFIS)

ADHD Symptoms

(BAARS)

1.96**

Figure 28: A simple mediation model with experiential avoidance mediating the relationship between ADHD symptoms and overall functional impairment. Indirect effect: .59, 95% CI: .37:.86.

Avoidance

(CBAS)

.51**

-.83 **

Depression

Symptoms

(CES-D)

ADHD

Diagnosis

-.05

Figure 29: A simple mediation model with cognitive behavioral avoidance mediating the relationship between self-reported ADHD diagnosis and depression symptoms. Indirect effect: -.42, 95% CI: -.59:-.27.

Avoidance

(CBAS)

.54**

-.83 **

Anxiety

Symptoms

(GAD-7)

ADHD

Diagnosis

-.10

Figure 30: A simple mediation model with cognitive behavioral avoidance mediating the relationship between self-reported ADHD diagnosis and anxiety symptoms. Indirect effect: -.45, 95% CI: -.64: -.28.

Avoidance

(CBAS)

-.35**

-.83 **

Friendship Satisfaction

(Sat)

ADHD

Diagnosis

-.15

Figure 31: A simple mediation model with cognitive behavioral avoidance mediating the relationship between self-reported ADHD diagnosis and friendship satisfaction. Indirect effect: .29, 95% CI: .15:.45.

Avoidance

(CBAS)

-.43**

-.71 **

Relationship Satisfaction

(RAS)

ADHD

Diagnosis

-.14

Figure 32: A simple mediation model with cognitive behavioral avoidance mediating the relationship between self-reported ADHD diagnosis and relationship satisfaction. Indirect effect: .30, 95% CI: .12:.53

Avoidance

(CBAS)

1.41**

-.83 **

Functional Impairment

(BFIS)

ADHD

Diagnosis

-1.74 **

Figure 33: A simple mediation model with cognitive behavioral avoidance mediating the relationship between self-reported ADHD diagnosis and overall functional impairment. Indirect effect: -1.17, 95% CI: -1.67:-.76.

Avoidance

(AAQ)

.30**

-1.08**

Depression

Symptoms

(CES-D)

ADHD

Diagnosis

-.14*

Figure 34: A simple mediation model with experiential avoidance mediating the relationship between self-reported ADHD diagnosis and depression symptoms. Indirect effect: -.32, 95% CI: -.48:-.17.

Avoidance

(AAQ)

-1.08 **

.34 **

Anxiety

Symptoms

(GAD-7)

ADHD

Diagnosis

-.18 *

Figure 35: A simple mediation model with experiential avoidance mediating the relationship between self-reported ADHD diagnosis and anxiety symptoms. Indirect effect: -.37, 95% CI: -.55:-.19.

Avoidance

(AAQ)

-.17 **

-1.08 **

Friendship Satisfaction

(Sat)

ADHD

Diagnosis

-.04

Figure 36: A simple mediation model with experiential avoidance mediating the relationship between self-reported ADHD diagnosis and friendship satisfaction. Indirect effect: .18, 95% CI: .08:.32.

Avoidance

(AAQ)

-1.14 **

-.23 **

Relationship Satisfaction

(RAS)

ADHD

Diagnosis

-.10

Figure 37: A simple mediation model with experiential avoidance mediating the relationship between self-reported ADHD diagnosis and relationship satisfaction. Indirect effect: .26, 95% CI: .10:.48.

Avoidance

(AAQ)

.73 **

-1.08 **

Functional Impairment

(BFIS)

ADHD

Diagnosis

-2.13 **

Figure 38: A simple mediation model with experiential avoidance mediating the relationship between self-reported ADHD diagnosis and overall functional impairment. Indirect effect: -.78, 95% CI: -1.22:

-.40.

Figure 39.

Avoidance

(CBAS)

ADHD Symptoms

(BAARS)

.49**

.84**

FIGURE 39. A serial multiple mediation model with cognitive behavioral avoidance and deficits in emotion regulation as serial mediators on the relationship between ADHD symptoms and depression symptoms.

Indirect Effects:

A  B  D – Value:  .26  95% CI  .18:.37

A  B  C  D – Value:  .14    95% CI   .06:24

A  C  D – Value:  .10   95% CI  .03 : .19

**p < .001, *p < .05

Depression Symptoms (CES-D)

-.004

.31**

.29**

.33**

Deficits in Emotion Regulation

Figure 40.

Avoidance

(CBAS)

ADHD Symptoms

(BAARS)

.49**

FIGURE 40. A serial multiple mediation model with cognitive behavioral avoidance and deficits in emotion regulation as serial mediators on the relationship between ADHD symptoms and anxiety symptoms.

Indirect Effects:

ABD – Value: .23 95% CI .10:.37

ABC D – Value: .14 95% CI .04:.29

ACD – Value: .10 95% CI .03:.22

**p < .001, *p < .05

Anxiety Symptoms

(GAD-7)

.84**

.28**

.14

.29**

.34**

Deficits in Emotion Regulation

Figure 41.

Avoidance

(CBAS)

ADHD Symptoms

(BAARS)

.49**

.84**

Friendship Satisfaction (Sat)

FIGURE 41. A serial multiple mediation model with cognitive behavioral avoidance and deficits in emotion regulation as serial mediators on the relationship between ADHD symptoms and friendship satisfaction.

Indirect Effects:

A  B  D – Value:  -.25   95% CI  -.40:-.11

A  B  C  D – Value:  -.06   95% CI  -.17:.04

A  C  D – Value:  -.04   95% CI  -.13:.02

**p < .001, *p < .05

-.30**

.14

.29**

-.14

Deficits in Emotion Regulation

Figure 42.

Avoidance

(CBAS)

ADHD Symptoms

(BAARS)

.49**

.84**

Relationship Satisfaction (RAS)

FIGURE 42. A serial multiple mediation model with cognitive behavioral avoidance and deficits in emotion regulation as serial mediators on the relationship between ADHD symptoms and romantic relationship satisfaction.

Indirect Effects:

A  B  D – Value:  -.32   95% CI  -.62:-.12

A  B  C  D – Value:  -.04   95% CI  -.22:.09

A  C  D – Value:  -.04   95% CI  -.20:.08

**p < .001, *p < .05

-.39**

.10

.40**

-.09

Deficits in Emotion Regulation

Figure 43.

Avoidance

(CBAS)

ADHD Symptoms

(BAARS)

.49**

.84**

Functional Impairment (BFIS)

1.62**

FIGURE 43. A serial multiple mediation model with cognitive behavioral avoidance and deficits in emotion regulation as serial mediators on the relationship between ADHD symptoms and functional impairment.

Indirect Effects:

A  B  D – Value:  .93  95% CI  .62:1.31

A  B  C  D – Value:  .15   95% CI  -.02:.35

A  C  D – Value:  .10   95% CI  -.01:.28

**p < .001, *p < .05

.82**

.29**

.35

Deficits in Emotion Regulation

Figure 44.

Avoidance

(AAQ)

ADHD Symptoms

(BAARS)

.28**

1.23**

Depression Symptoms (CES-D)

FIGURE 44. A serial multiple mediation model with experiential avoidance and deficits in emotion regulation as serial mediators on the relationship between ADHD symptoms and depression symptoms.

Indirect Effects:

A  B  D – Value: .25  95% CI  .16:.37

A  B  C  D – Value: .09  95% CI .04 to .17

A  C  D – Value: .09  95% CI .04:.16

**p < .001, *p < .05

.21**

.06

.36**

.25**

Deficits in Emotion Regulation

Figure 45.

Avoidance

(AAQ)

ADHD Symptoms

(BAARS)

.28**

1.23**

Anxiety Symptoms

(GAD-7)

.19*

FIGURE 45. A serial multiple mediation model with experiential avoidance and deficits in emotion regulation as serial mediators on the relationship between ADHD symptoms and anxiety symptoms.

Indirect Effects:

A  B  D – Value:   .31  95% CI  .18:.47

A  B  C  D – Value: .06   95% CI  -.008:.16

A  C  D – Value:  .06   95% CI  -.008:.15

**p < .001, *p < .05

.25**

.36**

.17*

Deficits in Emotion Regulation

Figure 46.

Avoidance

(AAQ)

ADHD Symptoms

(BAARS)

.28**

1.23**

-.19

FIGURE 46. A serial multiple mediation model with experiential avoidance and deficits in emotion regulation as serial mediators on the relationship between ADHD symptoms and friendship satisfaction.

Indirect Effects:

A  B  D – Value:  -.13   95% CI  -.30:.001

A  B  C  D – Value:  -.07   95% CI  -.17:.02

A  C  D – Value:  -.07   95% CI  -.18:.02

**p < .001, *p < .05

Friendship Satisfaction (Sat)

-.11

.07

.36**

Deficits in Emotion Regulation

Figure 47.

Avoidance

(AAQ)

ADHD Symptoms

(BAARS)

.28**

1.30**

Relationship Satisfaction (RAS)

FIGURE 47. A serial multiple mediation model with experiential avoidance and deficits in emotion regulation as serial mediators on the relationship between ADHD symptoms and romantic relationship satisfaction.

Indirect Effects:

A  B  D – Value:  -.26   95% CI  -.50:-.09

A  B  C  D – Value:  -.03   95% CI  -.19:.09

A  C  D – Value:  -.03   95% CI  -.20:.10

**p < .001, *p < .05

-.20*

.02

.44**

-.07

Deficits in Emotion Regulation

Figure 48.

Avoidance

(AAQ)

ADHD Symptoms

(BAARS)

.28**

1.23**

Functional Impairment (BFIS)

1.82**

FIGURE 48. A serial multiple mediation model with experiential avoidance and deficits in emotion regulation as serial mediators on the relationship between ADHD symptoms and functional impairment.

Indirect Effects:

A  B  D – Value:  .46   95% CI  .16:.81

A  B  C  D – Value:  .14   95% CI  -.01:.39

A  C  D – Value:  .14   95% CI  -.01:.36

**p < .001, *p < .05

.37**

.36**

.39

Deficits in Emotion Regulation

Figure 49.

Avoidance

(CBAS)

ADHD

Diagnosis

.59**

-.83**

Depression Symptoms (CES-D)

FIGURE 49. A serial multiple mediation model with cognitive behavioral avoidance and deficits in emotion regulation as serial mediators on the relationship between self-reported ADHD diagnosis and depression symptoms.

Indirect Effects:

A  B  D – Value:   -.26  95% CI  -.40 : -.15

A  B  C  D – Value:   -.16  95% CI  -.29 to -.08

A  C  D – Value:  -.06   95% CI   -.14:.01

**p < .001, *p < .05

.31**

.01

-.18

.33**

Deficits in Emotion Regulation

Figure 50.

Avoidance

(CBAS)

ADHD

Diagnosis

-.83**

Anxiety Symptoms

(GAD-7)

.59**

FIGURE 50. A serial multiple mediation model with cognitive behavioral avoidance and deficits in emotion regulation as serial mediators on the relationship between self-reported ADHD diagnosis and anxiety symptoms.

Indirect Effects:

A  B  D – Value:  -.26   95% CI  -.44:-.13

A  B  C  D – Value: -.19 95% CI  -.39:-.07

A  C  D – Value: -.07 95% CI  -.18:.01

**p < .001, *p < .05

.32**

-.03

-.18

.38**

Deficits in Emotion Regulation

Figure 51.

Avoidance

(CBAS)

ADHD

Diagnosis

-.83**

-.18

Friendship Satisfaction (Sat)

FIGURE 51. A serial multiple mediation model with cognitive behavioral avoidance and deficits in emotion regulation as serial mediators on the relationship between self-reported ADHD diagnosis and friendship satisfaction.

Indirect Effects:

A  B  D – Value:  .23   95% CI  .09:.42

A  B  C  D – Value:  .06  95% CI  -.04:.19

A  C  D – Value:  .02   95% CI  -.01:.10

**p < .001, *p < .05

.59**

-.28**

-.17

-.11

Deficits in Emotion Regulation

Figure 52.

Avoidance

(CBAS)

ADHD

Diagnosis

-.71**

Relationship Satisfaction (RAS)

FIGURE 52. A serial multiple mediation model with cognitive behavioral avoidance and deficits in emotion regulation as serial mediators on the relationship between self-reported ADHD diagnosis and romantic relationship satisfaction.

Indirect Effects:

A  B  D – Value:  .26   95% CI  .09:.58

A  B  C  D – Value:  .04   95% CI -.10:.24

A  C  D – Value:  .03   95% CI  -.06:.17

**p < .001, *p < .05

.62**

-.37*

-.17

-.32*

-.09

Deficits in Emotion Regulation

Figure 53.

Avoidance

(CBAS)

ADHD

Diagnosis

-.83**

Functional Impairment (BFIS)

-1.62**

-.18

FIGURE 53. A serial multiple mediation model with cognitive behavioral avoidance and deficits in emotion regulation as serial mediators on the relationship between self-reported ADHD diagnosis and functional impairment.

Indirect Effects:

A  B  D – Value:  -.85   95% CI  -1.39:-.48

A  B  C  D – Value:  -.33   95% CI  -.63:-.09

A  C  D – Value:  -.12  95% CI  -.34:.03

**p < .001, *p < .05

.59**

1.02**

.66*

Deficits in Emotion Regulation

Figure 54.

Avoidance

(AAQ)

ADHD

Diagnosis

-1.08**

Depression Symptoms (CES-D)

FIGURE 54. A serial multiple mediation model with experiential avoidance and deficits in emotion regulation as serial mediators on the relationship between self-reported ADHD diagnosis and depression symptoms.

Indirect Effects:

A  B  D – Value:  -.23   95% CI  -.37:-.12

A  B  C  D – Value:  -.09   95% CI  -.19:-.04

A  C  D – Value:  -.08   95% CI  -.16:-.03

 **p < .001, *p < .05

.34**

.21**

-.06

-.31**

.26**

Deficits in Emotion Regulation

Figure 55.

Avoidance

(AAQ)

ADHD

Diagnosis

-1.08**

Anxiety Symptoms

(GAD-7)

FIGURE 55. A serial multiple mediation model with experiential avoidance and deficits in emotion regulation as serial mediators on the relationship between self-reported ADHD diagnosis and anxiety symptoms.

Indirect Effects:

A  B  D – Value:  -.29   95% CI -.47:-.13

A  B  C  D – Value:  -.09   95% CI  -.20:-.02

A  C  D – Value:  -.07   95% CI  -.17:-.01

**p < .001, *p < .05

.34**

.26**

-.11

-.31**

.24*

Deficits in Emotion Regulation

Figure 56.

Avoidance

(AAQ)

ADHD

Diagnosis

-1.08**

Friendship Satisfaction (Sat)

-.18

FIGURE 56. A serial multiple mediation model with experiential avoidance and deficits in emotion regulation as serial mediators on the relationship between self-reported ADHD diagnosis and friendship satisfaction.

Indirect Effects:

A  B  D – Value:  .11   95% CI  -.001:.28

A  B  C  D – Value:  .07   95% CI  -.02:.20

A  C  D – Value:  .06   95% CI  -.01:.17

**p < .001, *p < .05

.34**

-.11

-.09

-.31**

Deficits in Emotion Regulation

Figure 57.

Avoidance

(AAQ)

ADHD

Diagnosis

.36**

-1.14**

Relationship Satisfaction (RAS)

FIGURE 57. A serial multiple mediation model with experiential avoidance and deficits in emotion regulation as serial mediators on the relationship between self-reported ADHD diagnosis and romantic relationship satisfaction.

Indirect Effects:

A  B  D – Value:  .22   95% CI  .07:.50

A  B  C  D – Value: .04   95% CI  -.07:.24

A  C  D – Value:  .04   95% CI  -.06:.18

**p < .001, *p < .05

-.20*

-.14

-.36*

-.10

Deficits in Emotion Regulation

Figure 5

-1.08**

Deficits in Emotion Regulation

FIGURE 58. A serial multiple mediation model with experiential avoidance and deficits in emotion regulation as serial mediators on the relationship between self-reported ADHD diagnosis and functional impairment.

Indirect Effects:

A  B  D – Value:  -.50   95% CI  -.89:.-.18

A  B  C  D – Value: -.29   95% CI  -.56:.-.09

A  C  D – Value:  -.24   95% CI  -.52:.-.05

**p < .001, *p < .05

Avoidance

(AAQ)

ADHD

Diagnosis

.34**

Functional Impairment (BFIS)

-1.88**

.46**

-.31**

.79**
